# Supplementary material
Source: Springer Nature journal article supplement (https://www.springermedizin.de/resource/supplementary/12950_2009_156_MOESM1_ESM.pdf/9558080)

**A****IL-12p70 secretion from 15 donors**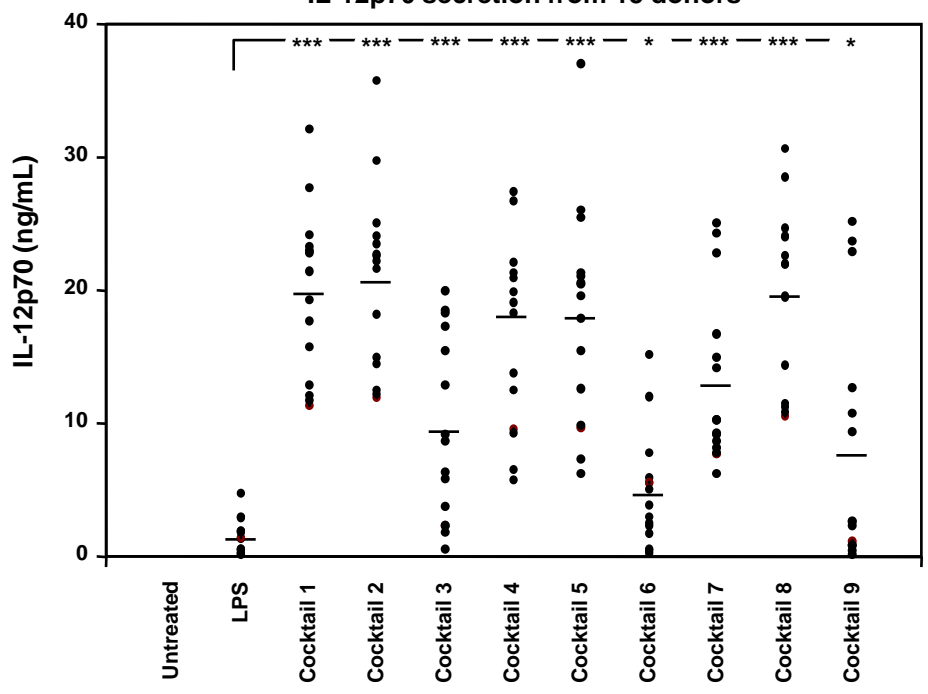**B****TNF $\alpha$  secretion from 15 donors**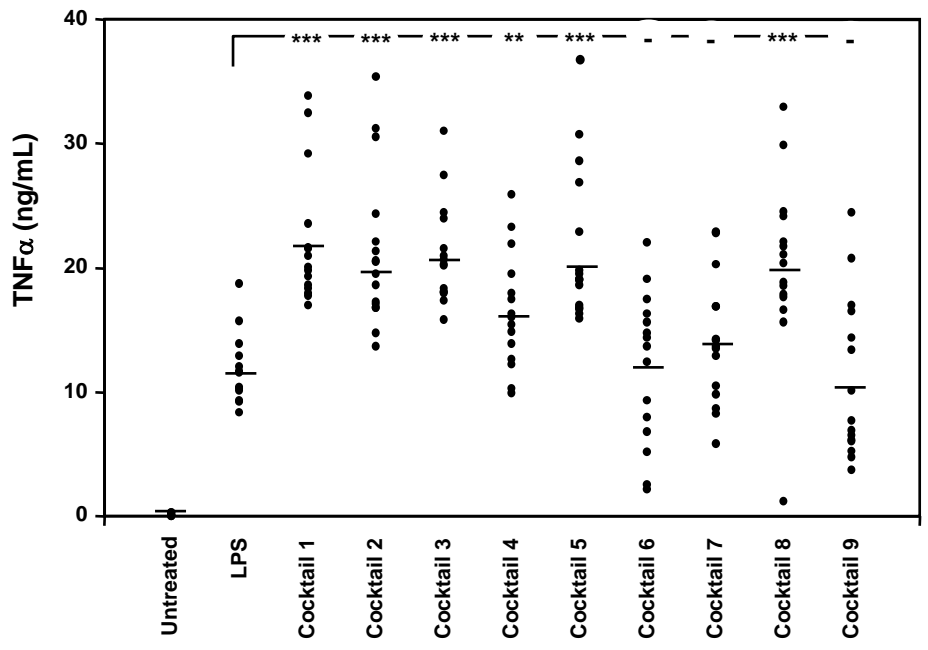

Supplement: MOESM1 [file 9558080]
